# Supplementary material for: Ginsenoside Rg1 treatment alleviates renal fibrosis by inhibiting the NOX4–MAPK pathway in T2DM mice
Source: PubMed Central journal article supplement — Ren Fail. 2023 Apr 5;45(1):2197075. doi: 10.1080/0886022X.2023.2197075 (PMC10078147; doi:10.1080/0886022x.2023.2197075), 2023-04-05
Supplement: IRNF_A_2197075_SM8750.pdf [file IRNF_A_2197075_SM8750.pdf]

## Supplemental Figure 1

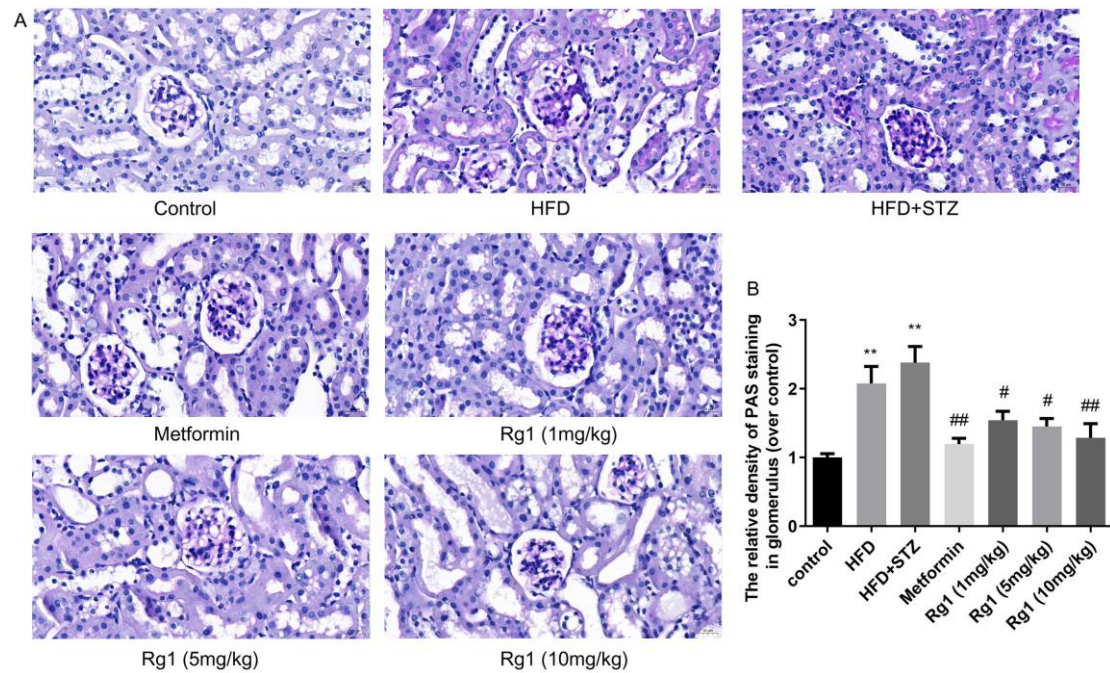

**Supplemental Figure 1** Effect of Rg1 treatment on the changes of PAS-positive area in T2DM mice.

(A) The result of PAS staining in the renal cortex (400 $\times$ ). (B) The relative density of PAS staining in the glomerulus. The data are expressed as the mean  $\pm$  SD,  $n = 4$ , \*\*  $P < 0.01$  compared with the control group; #  $P < 0.05$ , ##  $P < 0.01$  compared with the HFD+STZ group.
